# Supplementary material for: High Resolution Tropospheric Carbon Monoxide Profiles Retrieved from CrIS and TROPOMI
Source: Copernicus journal article supplement (doi:10.5194/amt-2015-404), 2016-01-21
Supplement: Supplementary file [file amt-2015-404-AC1-supplement.zip]

# High Resolution Tropospheric Carbon Monoxide Profiles Retrieved from CrIS and TROPOMI

Dejian Fu<sup>1</sup>, Kevin W. Bowman<sup>1</sup>, Helen M. Worden<sup>2</sup>, Vijay Natraj<sup>1</sup>, John R. Worden<sup>1</sup>, Shanshan Yu<sup>1</sup>, Pepijn Veefkind<sup>3,4</sup>, Ilse Aben<sup>5</sup>, Jochen Landgraf<sup>5</sup>, Lawrence Strow<sup>6</sup>, Yong Han<sup>7</sup>

[1]{NASA Jet Propulsion Laboratory, California Institute of Technology, Pasadena, California, United States of America}

[2]{National Center for Atmospheric Research, Boulder, Colorado, United States of America}

[3]{Royal Netherlands Meteorological Institute, Utrechtseweg, De Bilt, The Netherlands}

[4]{Delft University of Technology, Department of Geoscience and Remote Sensing, Stevinweg 1, Delft, The Netherlands}

[5]{SRON Netherlands Institute for Space Research, Sorbonnelaan, Utrecht, The Netherlands}

[6]{University of Maryland, Baltimore, Maryland, United States of America}

[7]{Center for Satellite Applications and Research, National Environmental Satellite, Data, and Information Service, NOAA, College Park, Maryland, United States of America}

Correspondence to: Dejian Fu (dejian.fu@jpl.nasa.gov)

## Abstract

The Measurements of Pollution in the Troposphere (MOPITT) instrument is the only satellite-borne sensor in operation that uses both thermal (TIR) and near infrared (NIR) channels to estimate CO profiles. With more than fifteen years (2000 to present) of validated multi-spectral observations, MOPITT provides the unique capability to separate CO in the Lower Most Troposphere (LMT, surface to 3 km (~700 hPa)) from the free tropospheric abundance. To extend this record, a new, hyper-spectral approach is presented here that will provide CO data products exceeding the capabilities of MOPITT instrument by combining the short

1 wavelength infrared (SWIR, equivalent to the MOPITT NIR) channels from the  
2 TROPOspheric Monitoring Instrument (TROPOMI) to be launched aboard the European  
3 Sentinel 5 Precursor (S5p) satellite in 2016, and the TIR channels from the Cross-track  
4 Infrared Sounder (CrIS) aboard Suomi National Polar-orbiting Partnership (Suomi NPP)  
5 satellite. We apply the MUlti-SpEctra, MUlti-SpEcies, Multi-SEnsors (MUSES) retrieval  
6 algorithm, to quantify the potential of this joint CO product. CO profiles are retrieved from a  
7 single-footprint, full spectral resolution CrIS transect over Africa on August 27-28, 2013  
8 coincident with significant biomass burning. Comparisons of collocated CrIS and MOPITT  
9 CO observations for the LMT show a mean difference of  $2.8 \pm 24.9$  ppb, which is well within  
10 the estimated measurement uncertainty of both sensors. The estimated degrees of freedom  
11 (DOFS) for CO signals from synergistic CrIS/TROPOMI retrievals are approximately 0.9 in  
12 the LMT and 1.3 above LMT, which indicates that the LMT CO can be distinguished near  
13 surface CO abundance information from the free troposphere, similar to MOPITT multiple  
14 spectral observations (0.8 in the LMT, and 1.1 above LMT). In addition to increased  
15 sensitivity, the combined retrievals reduce measurement uncertainty with ~15% error  
16 reduction in LMT. With a daily global coverage and a combined spatial footprint of 14 km,  
17 the joint CrIS/TROPOMI measurements have the potential to extend and improve upon the  
18 MOPITT multi-spectral CO data records for the coming decade.

19

## 20 **1 Introduction**

21 Observations of tropospheric carbon monoxide (CO) from space over the last decade have  
22 been exploited for monitoring air quality (e.g., Clerbaux et al., 2008a; Kar et al., 2010),  
23 quantifying CO emissions (e.g., Kopacz et al., 2009; Fortems-Cheiney et al., 2011), analyzing  
24 long-range transport of pollution (e.g., Heald et al., 2003; Edwards et al., 2006; Zhang et al.,  
25 2006), attributing sources and sinks of CO<sub>2</sub> concentrations (e.g., Silva et al., 2013), and  
26 evaluating chemical transport models and decadal trends in atmospheric composition (e.g.,  
27 Shindell et al., 2006; Worden et al., 2013a). The Measurements Of Pollution In The  
28 Troposphere (MOPITT) instrument, which is on the Earth Observation System EOS-Terra  
29 platform, has acquired more than fifteen years (2000 to present) of validated global CO  
30 observations (Emmons et al., 2007, 2009; Deeter et al., 2013, 2014). MOPITT is equipped  
31 with gas filter correlation radiometers (Drummond, 1992) measuring both CO first  
32 fundamental (4.6  $\mu\text{m}$ ) and overtone bands (2.3  $\mu\text{m}$ ). The synergy of CO first fundamental

1 band in the thermal infrared (TIR) and overtone band in the near infrared (NIR) provides an  
2 unprecedented sensitivity to probe CO in the [Lower Most Troposphere](#) (LMT, surface to 3  
3 km) (Worden et al., 2010; Worden et al., 2013b). This unique multi-spectral capability of  
4 MOPITT is not available from any single sensor on existing satellites that depend on a single  
5 spectral band, e.g., AIRS (Atmospheric Infrared Sounder) on EOS-Aqua (McMillan et al.,  
6 2005; Warner et al., 2007), TES (Tropospheric Emission Spectrometer) on EOS-Aura  
7 (Rinsland et al., 2006), IASI (Infrared Atmospheric Sounding Interferometer) on [METOP-A](#)  
8 [and B](#) (George et al., 2009), SCIAMACHY on Envisat (de Laat et al., 2007). Retrieval  
9 sensitivity to the LMT is critical for the operational use of satellite data in air quality, climate,  
10 and carbon applications, motivating the multi-spectral retrieval approach for a variety of  
11 species including [O<sub>3</sub> and CO](#), (Landgraf and Hasekamp 2007; Worden et al., 2010; Cuesta et  
12 al., 2013; Fu et al., 2013; [Luo et al., 2013](#); Worden et al., 2013a, 2013b).

13 All NASA space missions capable of measuring atmospheric CO concentrations have passed  
14 their nominal lifetime by years (Table 1). The European Space Agency (ESA) Sentinel 5  
15 precursor (S5p) TROPospheric Monitoring Instrument (TROPOMI), which is expected to  
16 launch in 2016 into an afternoon orbit behind the Suomi National Polar-orbiting Partnership  
17 (Suomi-NPP) satellite, has only NIR channels for CO measurements. The Cross-track  
18 Infrared Sounder (CrIS) aboard the Suomi-NPP satellite is a TIR sensor operating since  
19 October 28, 2011 and providing [measurements of full spectral resolution radiances for all](#)  
20 [three spectral bands](#) since December 4, 2014 ([Han et al., 2015](#)). The constellation of Suomi  
21 NPP and ESA S5p provides a unique set of collocated observations, which could extend the  
22 EOS-MOPITT multi-spectral CO data products with significant improvements on spatial  
23 resolution and coverage (Table 1). [This multi-spectral](#) retrieval algorithm [could](#) also be  
24 applied to the future joint Sentinel-5 UVNS/IASI-NG observations from METOP Second  
25 Generation satellites (Veefkind et al., 2012; Crevoisier et al., 2014), which [is anticipated](#) in  
26 the time period of 2022-2045.

27 [The Multi-SpEctra, Multi-SpEcies, Multi-SEnsors \(MUSES\)](#) retrieval algorithm, has a  
28 [generic design that incorporates hyperspectral forward model radiances from multiple sensors](#)  
29 [in a joint optimal estimation retrieval algorithm](#). MUSES has been applied to joint TES/OMI  
30 [ozone retrievals](#) (Fu et al., 2013; Worden et al., 2013b) using measured TIR/UV spectral  
31 [radiances and joint TES/MLS CO retrievals](#) (Luo et al., 2013) using measured TIR/  
32 [Microwave spectral radiances](#). In this paper, we first time describe the MUSES retrieval

algorithm that is capable of combining the TROPOMI and CrIS spectral radiances to produce atmospheric CO Volume Mixing Ratio (VMR) profiles with a vertical resolution that improves upon the EOS-Terra MOPITT multi-spectral CO data products. This multi-spectral observation strategy offers two significant advantages relative to traditional single band measurements: enhanced sensitivity to composition changes especially in the LMT, and reduced measurement uncertainty.

The paper is organized as follows: Section 2 describes the characteristics of CrIS/TROPOMI measurements and the pairing strategy. Section 3 describes the MUSES retrieval algorithm, samples of retrievals using CrIS full spectral resolution, single-footprint measurements, comparisons of collocated CrIS and MOPITT observations and estimated characteristics of synergistic CrIS/TROPOMI retrievals. Conclusions are presented in Section 4.

## 2 CrIS and TROPOMI

CrIS is on the Suomi NPP satellite in a near-polar, sun-synchronous, 828 km altitude orbit with a 1:30 pm equator crossing time (ascending node), and has been operational since October 28, 2011. TROPOMI will be on the ESA S5p satellite, planned for launch in 2016 with a design lifetime of 7 years (Table 1). S5p will fly within approximately 5 minutes of Suomi NPP, which enables collocated observations of atmospheric composition (cloud, aerosol, temperature, and trace gases) and surface properties (albedo, emissivity, and skin temperature), thus building upon the success of the “A-Train” constellation of Earth observation satellites.

CrIS is a Fourier transform spectrometer that measures the TIR radiances emitted by the Earth's surface and transmitted through atmospheric gases and particles in three spectral bands, including the long-wave IR band 1 ( $648.75\text{-}1096.25\text{ cm}^{-1}$ ), the mid-wave IR band 2 ( $1208.75\text{-}1751.25\text{ cm}^{-1}$ ), and the short-wave IR band 3 ( $2153.75\text{-}2551.25\text{ cm}^{-1}$ ) (Han et al., 2013, 2015; Strow et al., 2013a,b; Tobin et al., 2013; Wang et al., 2013). It was intended as the operational successor to the AIRS instrument on the Aqua Platform (Aumann et al., 2003; Pagano et al., 2003). The typical signal to noise ratio (SNR) of a CrIS measurement is about 800:1 in the spectral region of interest for CO. CrIS is a cross-track scanning instrument, whose full spectral resolution is  $0.625\text{ cm}^{-1}$ , providing measurements with daily global coverage (Table 1). Currently, the operational Level 1B products provide full spectral resolution only for the long-wave IR band 1 for entire lifetime of the mission (Han et al.,

1    2013). The full resolution ( $0.625 \text{ cm}^{-1}$ ) spectral radiance products for band 2 (was  $1.25 \text{ cm}^{-1}$ )  
 2    and band 3 (was  $2.5 \text{ cm}^{-1}$ ) have been available since December 4<sup>th</sup>, 2014 (Han et al., 2015).  
 3    Ground pixels have a diameter of 14 km at nadir. CrIS atmospheric measurements in the  
 4     $2155\text{-}2209 \text{ cm}^{-1}$  spectral region – nearly identical to observations of MOPITT TIR channels –  
 5    include high-density absorption features of the strongest fundamental band of CO and minor  
 6    absorption from interfering species, providing sensitivity for estimating the atmospheric CO  
 7    concentration. It is worth noting that Gambacorta et al., [2014] found that the information  
 8    content present in the CO retrievals improves up to one order of magnitude upon switching  
 9    from spectral resolution of  $2.5 \text{ cm}^{-1}$  to the full spectral resolution of  $0.625 \text{ cm}^{-1}$  (starting from  
 10    December 4<sup>th</sup> 2014).

11    TROPOMI will provide daily global coverage owing to its wide swath across track (Table 1).  
 12    It is a nadir-viewing push broom imaging spectrometer that measures backscattered and  
 13    reflected sunlight covering the 270-500 nm, 675-725 nm, 725-775 nm, and 2305-2385 nm  
 14    ( $4193\text{-}4338 \text{ cm}^{-1}$ ) spectral regions. Its atmospheric measurements in the  $2.3 \text{ }\mu\text{m}$  band – nearly  
 15    identical to observations of NIR channels of SCIAMACHY and MOPITT – include high-  
 16    density absorption features of the overtone band of CO, providing sensitivity for estimating  
 17    the CO total column average VMR. The module of the spectral band at  $2.3 \text{ }\mu\text{m}$  has a spectral  
 18    resolution of 0.25 nm and a spectral sampling rate of about 2.0-2.5 detector elements per  
 19    FWHM (Full Width at Half Maximum) (Veefkind et al., 2012). The ground pixel size of its  
 20    CO measurements at the nadir position is  $7 \times 7 \text{ km}^2$ , which yields a spatial resolution about 10  
 21    times higher than Terra-MOPITT ( $22 \times 22 \text{ km}^2$ ) mission (Table 1). Within the spectral region  
 22    of interest, the minimum spectral SNR of a single TROPOMI measurement is 120:1 in the  
 23    continuum around 2310 nm ( $4329 \text{ cm}^{-1}$ ), specified for a scene with a surface albedo of 5%  
 24    and solar zenith angle of  $70^\circ$  (Veefkind et al., 2012).

25    In order to match the CrIS footprint size, our retrieval algorithm will average 4 adjacent pixels  
 26    of TROPOMI prior to the spectral fittings. Hence, the effective SNR of TROPOMI  
 27    measurements for the synergistic retrievals will be greater than 240:1. The joint  
 28    CrIS/TROPOMI spatial resolution will be  $14 \times 14 \text{ km}^2$  at the nadir position, about 2.5 times  
 29    higher than that of the MOPITT mission (Table 1). MUSES algorithm uses single footprint  
 30    CrIS L1B radiances into the retrievals, leading to the 9 times smaller footprint size (Table 1)  
 31    than that of operational algorithm (Gambacorta et al., 2014).

Daytime ascending node CO retrievals are available from TROPOMI and CrIS whereas nocturnal descending node CO depends exclusively on CrIS. The daily spatial sampling of the joint CrIS/TROPOMI measurements is more than [eight](#) times better than that of Terra MOPITT since CrIS/TROPOMI measurements have  $\sim 3.5$  times wider swath and 2.5 times finer ground pixel size compared to MOPITT (Table 1). After performing the temporal and spatial matches among CrIS/TROPOMI measurements, the distances between matched CrIS/TROPOMI observations in the nadir direction are within 3 km – smaller than the pixel sizes of both instruments. The associated temporal differences are within 5 minutes. In general, these spatial and temporal separations are small compared to the scales of variability anticipated for CO and could be neglected. Over complex source regions, such as urban areas, the special treatments on achieving perfect spatial match might be necessary.

12

### 13 **3 Retrieval algorithm, sample results and retrieval characteristics**

This section describes the MUSES algorithm for synergistic retrievals of CO profiles (Section 3.1), sample retrievals when only using CrIS measurements (Section 3.2), synthetic joint CrIS/TROPOMI CO retrievals to [assess](#) the characteristics of improved tropospheric CO profiling when combining TIR/NIR observations (Section 3.3).

#### 18 **3.1 MUSES retrieval algorithm for producing joint TROPOMI and CrIS carbon monoxide volume mixing matrix profile data products**

The MUSES retrieval algorithm is based upon [the](#) Optimal Estimation (OE) method (Rodgers 2000). OE combines a priori knowledge, which includes both a mean state and covariance of the atmospheric state, and the measurements to infer the atmospheric state. The OE algorithm computes the best estimate state vector  $\hat{\mathbf{x}}$ , which represents the concentration of atmospheric trace gases and ancillary parameters, by minimizing the following cost function

$$25 \quad C(\mathbf{x}) = \|\mathbf{x} - \mathbf{x}_a\|_{\mathbf{S}_a^{-1}}^2 + \|\mathbf{L}_{\text{obs}} - \mathbf{L}_{\text{sim}}(\mathbf{x})\|_{\mathbf{S}_\epsilon^{-1}}^2 \quad (1)$$

Equation 1 is a sum of quadratic functions representing Euclidean  $\mathbf{L}^2$  norm ( $\|\mathbf{b}\|_{\mathbf{A}}^2 = \mathbf{b}^T \mathbf{A} \mathbf{b}$ ), with the first term accounting for the difference between the retrieval vector  $\mathbf{x}$  and a priori state  $\mathbf{x}_a$ , inversely weighted by the a priori matrix  $\mathbf{S}_a$ , and with the second term representing the difference between the observed  $\mathbf{L}_{\text{obs}}$  and simulated  $\mathbf{L}_{\text{sim}}(\mathbf{x})$  radiance spectra inversely weighted by the measurement error covariance matrix  $\mathbf{S}_\epsilon$ .

1 Under the assumption that measurement error between TROPOMI and CrIS are uncorrelated,  
 2 Eq. 1 can be written as:

$$\begin{aligned}
 C(\mathbf{x}) = & \|\mathbf{x} - \mathbf{x}_a\|_{\mathbf{S}_a}^{-2} + \underbrace{\|\mathbf{L}_{\text{obs\_TROPOMI}} - \mathbf{L}_{\text{sim\_TROPOMI}}(\mathbf{x})\|_{\mathbf{S}_{\epsilon\_TROPOMI}}^{-2}}_{\text{TROPOMI}} \\
 & + \underbrace{\|\mathbf{L}_{\text{obs\_CrIS}} - \mathbf{L}_{\text{sim\_CrIS}}(\mathbf{x})\|_{\mathbf{S}_{\epsilon\_CrIS}}^{-2}}_{\text{CrIS}} \quad (2)
 \end{aligned}$$

3  
 4 The joint retrieval algorithm iteratively updates the state vector based upon a trust-region  
 5 Levenberg-Marquardt optimization algorithm to minimize the cost function in Eq. 2 (Rodgers  
 6 2000; Bowman et al., 2006):

$$\begin{aligned}
 \mathbf{x}_{i+1} = & \mathbf{x}_i + \left[ \mathbf{S}_a^{-1} + \underbrace{\mathbf{K}_{\text{TROPOMI}}^T \mathbf{S}_{\epsilon\_TROPOMI}^{-1} \mathbf{K}_{\text{TROPOMI}}}_{\text{TROPOMI}} + \underbrace{\mathbf{K}_{\text{CrIS}}^T \mathbf{S}_{\epsilon\_CrIS}^{-1} \mathbf{K}_{\text{CrIS}}}_{\text{CrIS}} \right]^{-1} \\
 & * \left[ \mathbf{S}_a^{-1} (\mathbf{x}_a - \mathbf{x}_i) + \underbrace{\mathbf{K}_{\text{TROPOMI}}^T \mathbf{S}_{\epsilon\_TROPOMI}^{-1} \Delta \mathbf{L}_{\text{TROPOMI}}}_{\text{TROPOMI}} + \underbrace{\mathbf{K}_{\text{CrIS}}^T \mathbf{S}_{\epsilon\_CrIS}^{-1} \Delta \mathbf{L}_{\text{CrIS}}}_{\text{CrIS}} \right] \quad (3)
 \end{aligned}$$

7 where,  $\mathbf{K}$  is the Jacobian matrix representing sensitivity of spectral radiances to the  
 8 atmospheric state; and  $\Delta \mathbf{L}$  is the difference between observed and simulated spectral  
 9 radiances.  
 10

11 To simulate thermal infrared spectral radiances  $\mathbf{L}_{\text{sim\_CrIS}}$  and Jacobians  $\mathbf{K}_{\text{CrIS}}$ , the [joint CrIS](#)  
 12 [and TROPOMI algorithm](#) incorporates the forward model of TES operational algorithm  
 13 (Bowman et al., 2006, Clough et al., 2006), with CrIS specifications (spectral range,  
 14 resolution, SNRs, and viewing geometry) obtained from CrIS L1B data products. In the NIR  
 15 region, we use the Vector Linearized Discrete Ordinate Radiative Transfer (VLIDORT)  
 16 model (Spurr, 2006, 2008), with the specification for TROPOMI measurements (spectral  
 17 range, resolution, SNRs) described in Veefkind (2012), to compute the spectral radiances  
 18  $\mathbf{L}_{\text{sim\_TROPOMI}}$  and Jacobians  $\mathbf{K}_{\text{TROPOMI}}$ . The characteristics of joint CrIS/TROPOMI CO  
 19 retrievals will be illustrated in section 3.3.

20 The joint TROPOMI and CrIS retrievals start with the list of the fitting parameters, a priori  
 21 values and a priori [variance](#) shown in Table 2. In addition to the initial guess for the trace gas  
 22 concentration (CO, H<sub>2</sub>O, CH<sub>4</sub>, and N<sub>2</sub>O), the initial guess for auxiliary parameters used in the  
 23 simulation of CrIS radiances (including temperature profile, surface temperature and

1 emissivity, cloud extinction and top pressure) are also retrieved from CrIS radiances in order  
2 to take into account their spectral signatures in the CO spectral regions.

3 When the clouds travel across its field of viewing, a space sensor for atmospheric  
4 composition measurements often faces to the challenge of obtaining high precision and  
5 accuracy measurements of the trace gas vertical distribution due to the possible interfering  
6 among retrieval parameters. MUSES algorithm uses single footprint CrIS L1B radiances into  
7 the retrievals, leading to the 9 times smaller footprint size (Table 1) than that of operational  
8 algorithm (Gambacorta et al., 2014), reducing the impacts of cloud interference on trace gas  
9 retrievals. In addition, MUSES algorithm has been designed to utilize the information from  
10 multiple satellites that provide collocated high quality cloud measurements. The high  
11 resolution VIIRS aboard Suomi NPP will provide access to high spatial resolution visible and  
12 IR information that can be used quantify cloud impact. This convoy enables cloud-  
13 prescreening using Visible Infrared Imaging Radiometer Suite (VIIRS) cloud products  
14 (Platnick et al., 2013), which is a scanning radiometer on the Suomi NPP satellite. This cloud  
15 prescreening improves the efficiency of data processing and the quality of the retrieved  
16 profiles. Cloudy scenes for the CrIS geometry (~14.0 km diameter at nadir) will be  
17 characterized using the mature infrared cloud forward modeling techniques used in the TES  
18 retrievals (Kulawik et al., 2006; Eldering et al., 2008). For the cloud and aerosol radiative  
19 modeling within the Field Of View (FOV) of the TROPOMI sensor, we will adopt the  
20 algorithm that has been used in the production of Orbiting Carbon Observatory 2 (OCO-2)  
21 version 6 Level 2 standard products (Boesch et al., 2015). We will retrieve the Gaussian  
22 parameters that represent the optical depth profiles for water/ice clouds and top two aerosols  
23 specified by the Modern Era Retrospective analysis for Research and Applications aerosol  
24 reanalysis (MERRAero) climatology (2009-2010) (Table 2). We will use VIIRS Level 2  
25 products of surface temperature (Hook et al., 2012), and cloud property (cloud fraction, cloud  
26 optical thickness, and cloud top pressure (Baker 2011a,b; 2012)) as a priori information to  
27 retrieve ancillary parameters.

28 Optimal estimation theory provides tools characterize the retrievals, e.g., vertical  
29 resolution/sensitivity and uncertainty. The averaging kernel matrix (**A**) and error covariance  
30 (**S**) can be calculated as follows (Rodgers, 2000):

31 
$$\mathbf{A} = \mathbf{GK} \quad (4)$$

32 and

$$\mathbf{S} = (\mathbf{I} - \mathbf{A})\mathbf{S}_a(\mathbf{I} - \mathbf{A})^T + \mathbf{G}\mathbf{S}_\epsilon\mathbf{G}^T \quad (5)$$

Where  $\mathbf{I}$  is a unitary matrix,  $\mathbf{S}_a$  is the a priori covariance matrix of the full retrieved state, which contains both atmospheric and auxiliary parameters,  $\mathbf{S}_\epsilon$  is the measurement noise covariance, and  $\mathbf{G}$ , the gain matrix, can be written as the following equation,

$$\mathbf{G} = (\mathbf{K}^T\mathbf{S}_\epsilon^{-1}\mathbf{K} + \mathbf{S}_a^{-1})^{-1}\mathbf{K}^T\mathbf{S}_\epsilon^{-1} \quad (6)$$

### 3.2 Carbon monoxide measured from CrIS and MOPITT during an African biomass burning event

A biomass-burning event is observed in Aqua MODIS fire data products (Giglio et al., 2003; Davies et al., 2004), collocated with the CrIS and MOPITT ground tracks, on August 27<sup>th</sup>, 28<sup>th</sup> 2013 over Africa (Fig. 1). The CO concentration in the LMT during this biomass-burning event shows a strong latitudinal gradient with local variation, based on the MOPITT data (Fig. 2A). This gradient provides an excellent opportunity to evaluate the performance of CrIS and future CrIS/TROPOMI retrievals (section 3.3). We applied the MUSES algorithm to retrieve CO profiles using real CrIS full spectral resolution, single footprint measurements, and then compared the retrieved profiles to the collocated MOPITT retrievals. When running in the retrieval mode that only uses CrIS measurements, the TROPOMI terms in the right-hand side of Eq. 2 and Eq. 3 vanish.

The CrIS measurements clearly capture the CO gradient centered at 10°S and diminishing poleward to roughly 20°S (Figs. 2C, 2D and 3A), associated with the biomass-burning event detected by the enhanced MODIS radiative fire power (Fig. 1). Table 3 shows the mean and RMS (or standard deviation) of the difference between CrIS and MOPITT TIR CO observations in LMT is  $-6.9 \pm 22.8$  ppb, respectively, which is better than the differences between CrIS and MOPITT multi-spectral observations ( $-22.9 \pm 38.8$  ppb, Table 3). The differences between CrIS and MOPITT observed CO VMR could arise from the following four sources: [1] a priori CO profiles used in the retrievals (Figs. 2D, 2E; Fig. 3B); [2] measurement sensitivity; [3] measurement date/time (MOPITT local time 10:30 am on August 27<sup>th</sup>, CrIS local time 1:30 pm on August 28<sup>th</sup>, 2013), which could lead to different meteorological conditions; [4] differences in auxiliary retrieved parameters such as surface temperature, temperature profiles, water vapor and cloud conditions.

1 The diurnal variation of MODIS fire radiative power and fire counts for the time period of  
2 August 27 to 28, 2013, is weak. The retrievals for the same set of soundings were recomputed  
3 using a constant CO a priori profile, which is 100.0 ppb in LMT (Supplemental Material  
4 Figure 1) and representative of clean air conditions. When using common a priori profiles,  
5 both MOPITT and CrIS retrievals still show a latitudinal gradient (Suppl. Figures 1 and 2)  
6 with enhanced CO VMR peaked near 12 degree south, similar to the gradient shown in Fig. 3,  
7 though the amplitude of CO enhanced concentration is smaller. Consequently, it indicates that  
8 the consistency of measurements from two TIR sensors is insensitive to the choice of a priori.  
9 The mean differences between CrIS and MOPITT TIR improved to 2.8 ppb (Suppl. Table 1),  
10 with the RMS (or standard deviation) of the difference changed from 9.7% to 13.9%. Tables 4  
11 and 5 show the measurement characteristics (Table 4 for sensitivity and Table 5 for the  
12 precisions) of the MOPITT and CrIS/TROPOMI. The mean and RMS of the differences  
13 between CrIS and MOPITT multi-spectral CO data products are  $-23.6 \pm 37.6$  ppb (or  $-9.7$   
14  $\pm 16.8\%$ , Suppl. Table 1), which is greater than the differences between CrIS and MOPITT  
15 TIR ( $2.8 \pm 24.9$  ppb or  $1.6 \pm 13.9\%$ , Suppl. Table 1) and also greater than the estimated  
16 measurement uncertainty (CrIS 13.8%; MOPITT joint TIR/NIR 14.3%, Table 5). This  
17 difference is expected between CrIS and MOPITT multispectral sensitivity as quantified by  
18 the averaging kernels, which represent the sensitivity of the CO retrieval to the true state, as  
19 shown in Fig. 4A and Fig. 4B for CrIS and MOPITT, respectively. The higher amplitude  
20 averaging kernels for MOPITT multi-spectral observations in Fig. 4B quantify the enhanced  
21 near surface sensitivity.

### 22 **3.3 Characteristics of joint TROPOMI and CrIS CO profile retrievals**

23 To access the characteristics of improved tropospheric CO profiling when combining  
24 TIR/NIR observations, we computed the averaging kernels, degrees of freedom for signal  
25 (DOFS, the trace of averaging kernels), and error covariance matrix for both synergistic and  
26 each instrument alone observations. We used the CrIS viewing geometry for the simulation of  
27 TROPOMI measurements (described in section 3.1) since the tandem orbit of Suomi NPP and  
28 TROPOMI is very similar.

29 Figures 4-6 and Table 4 show the retrieval diagnostics. We find that the CO profiles generated  
30 from joint CrIS/TROPOMI measurements have vertical resolution (Fig. 4D) and sensitivity  
31 (mean total DOFS of 2.22, Table 4) similar to the MOPITT joint TIR/NIR measurements  
32 (Fig. 4A, Fig. 6A; Table 4, mean total DOFS of 1.88), while the estimated total uncertainty

1 (magenta lines in Fig. 6B and 6C) are smaller than that of MOPITT joint TIR/NIR  
2 measurements. The synergistic CrIS/TROPOMI observations clearly distinguish the LMT  
3 (green lines in Fig. 4D) and middle troposphere (magenta lines in Fig. 4D). The synergistic  
4 CrIS/TROPOMI measurements show significant improvements on the sensitivity in  
5 comparisons to individual measurements from both CrIS and TROPOMI missions (Fig. 4B/C;  
6 Fig. 5; Table 4). The latitudinal gradient of biomass burning intensity (Fig. 2F, Fig. 3C, fire  
7 counts 0-250; max fire radiative power 0-800 mW), CO concentration (Fig. 3 A, 100-400  
8 ppb), and DOFS (Fig. 5, CrIS 1-1.7; TROPOMI 1-1.5) show similar pattern across the  
9 transect. The synergistic CrIS/TROPOMI, however, has higher DOFS, generally above 2  
10 (Fig. 5A), because of its higher LMT sensitivity (Table 4, DOFS of 0.9 for joint vs. 0.6 for  
11 CrIS, TROPOMI alone). And the sensitivity of MOPITT TIR and CrIS measurements for  
12 LMT are approximately identical (0.56 vs. 0.62). The estimated sensitivity of joint  
13 CrIS/TROPOMI measurements show improvements in comparisons to MOPITT synergistic  
14 TIR/NIR observations, possibly a consequence of TROPOMI's 'staring' viewing mode,  
15 which does not have the issue of geophysical radiance error found by Deeter et al. (2011) for  
16 the MOPITT NIR sensor, which is a 'dragging' instrument. It is worth noting that the  
17 minimum spectral SNR of TROPOMI measurements were used in synthetic TROPOMI alone  
18 and joint CrIS/TROPOMI measurements; the actual performances of joint CrIS/TROPOMI  
19 could be even better than that shown in Figs. 4-6.

20 The total error (or uncertainty) consists of two terms (Equation 5): the first term represents the  
21 smoothing error and the second term is the measurement error. By incorporating radiances  
22 measured by two nadir-viewing instruments (Equation 3), the error characteristics of joint  
23 CrIS/TROPOMI tropospheric CO estimates can be substantially improved, in comparison  
24 with joint CrIS/TROPOMI and each instrument alone. Particularly, in the altitude range from  
25 Surface to 3 km (~700 hPa), we have seen the total uncertainty reduced from 30% (using  
26 measurements from each instrument alone) to 15% (joint TIR/NIR). This increased sensitivity  
27 and decrease in uncertainty are critical for evaluating the role of tropical fires (or pyro-  
28 convection) on the CO distribution (Fromm et al., 2005, 2006).

29

## 30 4 Conclusions

31 Based upon the MUSES synergistic retrieval algorithm, the combined CrIS/TROPOMI  
32 observations can extend and improve on the EOS-Terra MOPITT multi-spectral carbon

1 monoxide profile data products with the higher vertical resolution and accuracy compared to  
2 any single nadir-viewing platform and over 2.5 times higher spatial sampling than MOPITT.

3 The MUSES algorithm has been applied to retrieve carbon monoxide volume mixing ratio  
4 profiles using full spectral resolution, single footprint CrIS measurements over Africa on  
5 August 28, 2013. The agreement of retrieved carbon monoxide volume mixing ratio in the  
6 lower most troposphere (surface to 3 km; ~700 hPa) between CrIS and MOPITT TIR data  
7 products –August 27<sup>th</sup> is  $-6.9 \pm 22.8$  ppb when using different a priori profiles in retrievals; and  
8  $2.8 \pm 24.9$  ppb when for using common a priori in retrievals.

9 The simulated synergistic retrievals of CrIS/TROPOMI yields 0.9 degrees of freedom for CO  
10 signals in the LMT and 1.3 above LMT, distinguishing signals from the LMT and that above  
11 LMT in the troposphere, similar to that of MOPITT multiple spectral observation (DOFS 0.8  
12 in the LMT, and 1.1 above LMT). In addition to increased sensitivity, the joint retrievals  
13 reduce measurement uncertainty, especially in the LMT, about 15% error reduction in the  
14 altitude range from surface to 3 km (~700 hPa). The potentials of synergistic CrIS/TROPOMI  
15 observations will be fully exploit using MUSES algorithm when TROPOMI Level 1B  
16 spectral radiances become available. The validation of CO retrievals using aircraft in situ  
17 profiles will be accomplished in the near future.

18 By achieving information content that rivals the EOS-Terra MOPITT measurements,  
19 synergistic CrIS/TROPOMI CO observations not only demonstrably enhances the scientific  
20 value of S5p TROPOMI and Suomi NPP, but also extends the climate and tropospheric  
21 records needed to continue NASA EOS science. Furthermore, the broad coverage of Suomi  
22 NPP will provide global CO (a key tracer gas in the diagnostics of transport and chemical  
23 reaction processes in the atmosphere) that complements the NASA Decadal Survey GEO-  
24 CAPE geostationary sounder (Fishman et al., 2012; <http://geo-cape.larc.nasa.gov/>). GEO-  
25 CAPE is envisaged as a member of the Committee on Earth Observing Systems (CEOS) air  
26 quality constellation, which includes the Korean GEMS (Bak et al., 2013), ESA Sentinel-4  
27 (Ingmann et al., 2012; [www.ceos.org/acc](http://www.ceos.org/acc)), and possibly Canadian PCW missions (Nassar et  
28 al., 2014; <http://www.asc-csa.gc.ca/eng/satellites/pcw/>). The joint CrIS/TROPOMI retrieval  
29 algorithm can also be applied to the future joint Sentinel-5 UVNS/IASI-NG observations  
30 from METOP Second Generation satellites, which could provide joint NIR/TIR CO  
31 measurements in the time period of 2022-2045 (Veefkind et al., 2012; Crevoisier et al., 2014).  
32 The joint CrIS/TROPOMI CO profiles will enable the quantification of transport and

transformation of atmospheric composition in the domains unobserved by this constellation. This combination of low-earth orbiting and geostationary space sounders would provide an unprecedented atmospheric composition observing system needed to address long-term scientific questions in climate, air quality, and atmospheric chemistry.

## Acknowledgements

The authors thank Drs. [David Crisp](#), Annmarie Eldering, Michael R. Gunson, Susan S. Kulawik, Karen Cady-Pereira, Vivienne H. Payne, Bradley R. Pierce, and Stanley P. Sander for many helpful discussions. Support from the NASA ROSE-2013 Atmospheric Composition: AURA Science Team program (grant number: NNN13D455T) is gratefully acknowledged. Part of the research was carried out at the Jet Propulsion Laboratory, California Institute of Technology, under a contract with the National Aeronautics and Space Administration. Copyright 2015, California Institute of Technology. Government sponsorship acknowledged.

## References

- [Allen N.D.C., Bernath P.F., Boone C.D., Chipperfield M.P., Fu D., Manney G.L., Oram D.E., Toon G.C., Weisenstein D.K.: Global carbon tetrachloride distributions obtained from the Atmospheric Chemistry Experiment \(ACE\), Atmos. Chem. Phys., 9\(19\), 7449-7459, 2009.](#)
- Aumann H., Chahine M.T., Gautier C., Goldberg M.D, Kalnay E., McMillin L.M., Revercomb H., Rosenkranz P.W., Smith W.L., Staelin D.H., Strow L.L., and Susskind J.: AIRS/AMSU/HSB on the Aqua mission: Design, science objectives, data products, and processing systems, IEEE Trans. Geosci. Remote Sensing, 41, 253-264, 2003.
- Bak J., Kim J.H., Liu X., Chance K., and Kim J.: Evaluation of ozone profile and tropospheric ozone retrievals from GEMS and OMI spectra, Atmos. Meas. Tech., 6, 239-249, 2013.
- Baker N.: Joint Polar Satellite System (JPSS) VIIRS Cloud Cover/Layers Algorithm Theoretical Basis Document (ATBD), NASA Goddard Space Flight Center Technical Report, 2011a.

1 Baker N.: Joint Polar Satellite System (JPSS) VIIRS Cloud Effective Particle Size and Cloud  
2 Optical Thickness Algorithm Theoretical Basis Document (ATBD), NASA Goddard Space  
3 Flight Center Technical Report, 2011b.

4 Baker N.: Joint Polar Satellite System (JPSS) Cloud Top Algorithm Theoretical Basis  
5 Document (ATBD), NASA Goddard Space Flight Center Technical Report, 2012.

6 Bernath P.F., McElroy C.T., Abrams M.C., Boone C.D., Butler M., Camy-Peyret C., Carleer  
7 M., Clerbaux C., Coheur P.-F., Colin R., DeCola P., DeMazière M., Drummond J.R., Dufour  
8 D., Evans W.F.J., Fast H., Fussen D., Gilbert K., Jennings D. E., Llewellyn E.J., Lowe R.P.,  
9 Mahieu E., McConnell J.C., McHugh M., McLeod S.D., Michaud R., Midwinter C., Nassar  
10 R., Nichitiu F., Nowlan C., Rinsland C.P., Rochon Y. J., Rowlands N., Semeniuk K., Simon  
11 P., Skelton R., Sloan J.J., Soucy M.-A., Strong K., Tremblay P., Turnbull D., Walker K.A.,  
12 Walkty I., Wardle, D.A., Wehrle V., Zander R., and Zou J.: Atmospheric Chemistry  
13 Experiment (ACE): Mission overview, *Geophys. Res. Lett.*, 32, L15S01,  
14 doi:10.1029/2005GL022386, 2005.

15 Boone C.D., Nassar R., Walker K.A., Rochon Y., McLeod S.D., Rinsland C.P., and Bernath  
16 P.F.: Retrievals for the atmospheric chemistry experiment Fourier-transform spectrometer,  
17 *Appl. Optics*, 44 (33), 7218–7231, 2005.

18 Boesch H., Brown L., Castano R., Christi M., Connor B., Crisp D., Eldering A., Fisher B.,  
19 Frankenberg C., Gunson M., Granat R., McDuffie J., Miller C., Natraj V., O’Brien D., O’Dell  
20 C., Osterman G., Oyafuso F., Payne V., Polonski I., Smyth M., Spurr R., Thompson D., Toon  
21 G.: Orbiting Carbon Observatory-2 (OCO-2) Level 2 full physics retrieval algorithm  
22 theoretical basis, version 2.0 revision 2, March 30 2015, data releases 6 and 6R.  
23 [http://disc.sci.gsfc.nasa.gov/OCO-2/documentation/oco-2-v6/OCO2\\_L2\\_ATBD.V6.pdf](http://disc.sci.gsfc.nasa.gov/OCO-2/documentation/oco-2-v6/OCO2_L2_ATBD.V6.pdf)

24 Bowman K.W., Rodgers C.D., Kulawik S.S., Worden J., Sarkissian E., Osterman G., Steck  
25 T., Lou M., Eldering A., Shephard M., Worden H., Lampel M., Clough S., Brown P.,  
26 Rinsland C., Gunson M., Beer R.: Tropospheric Emission Spectrometer: Retrieval Method  
27 and Error Analysis, *IEEE Trans. Geosci. Remote Sensing*, 44, 1297-1307, 2006.

28 Brasseur G.P., Hauglustaine D.A., Walters S., Rasch P.J., Muller J.F., Granier C., and Tie  
29 X.X.: MOZART, a global chemical transport model for ozone and related chemical tracers 1.  
30 Model description, *J. Geophys. Res.*, 103(D21), 28265-28289, 1998.

1 Buchard V., da Silva A. M., Colarco P. R., Darmenov A., Randles C. A., Govindaraju R.,  
2 Torres O., Campbell J., and Spurr R.: Using the OMI aerosol index and absorption aerosol  
3 optical depth to evaluate the NASA MERRA Aerosol Reanalysis, *Atmos. Chem. Phys.*, 15,  
4 5743-5760, 2015.

5 Clerbaux C., Edwards D.P., Deeter M., Emmons L., Lamarque J.-F., Tie X.X., Massie S.T.,  
6 and Gille J.: Carbon monoxide pollution from cities and urban areas observed by the  
7 Terra/MOPITT mission, *Geophys. Res. Lett.*, 35, L03817, 1-6, 2008a.

8 Clerbaux C., George M., Turquety S., Walker K.A., Barret B., Bernath P., Boone C.,  
9 Borsdorff T., Cammas J.P., Catoire V., Coffey M., Coheur P.-F., Deeter M., De Mazière M.,  
10 Drummond J., Duchatelet P., Dupuy E., de Zafra R., Eddounia F., Edwards D.P., Emmons L.,  
11 Funke B., Gille J., Griffith D.W.T., Hannigan J., Hase F., Höpfner M., Jones N., Kagawa A.,  
12 Kasai Y., Kramer I., Le Flochmoën E., Livesey N.J., López-Puertas M., Luo M., Mahieu E.,  
13 Murtagh D., Nédélec P., Pazmino A., Pumphrey H., Ricaud P., Rinsland C.P., Robert C.,  
14 Schneider M., Senten C., Stiller G., Strandberg A., Strong K., Sussmann R., Thouret V.,  
15 Urban J., Wiacek A.: CO measurements from the ACE-FTS satellite instrument: data analysis  
16 and validation using ground-based, airborne and spaceborne observations, *Atmos. Chem.*  
17 *Phys.*, 8, 2569-2594, 2008b.

18 Clough S.A., Shephard M.W., Worden J.; Brown P.D., Worden H.M.; Luo M., Rodgers C.D.,  
19 Rinsland C.P., Goldman A., Brown L., Kulawik S.S., Eldering A., Lampel M.C., Osterman  
20 G., Beer R., Bowman K., Cady-Pereira K.E., Mlawer E.J.: Forward Model and Jacobians for  
21 Tropospheric Emission Spectrometer Retrievals, *IEEE Trans. Geosci. Remote Sensing*, 44,  
22 1308-1323, 2006.

23 Crevoisier C., Clerbaux C., Guidard V., Phulpin T., Armante R., Barret B., Camy-Peyret C.,  
24 Chaboureaud J.-P., Coheur P.-F., Crépeau L., Dufour G., Labonnote L., Lavanant L., Hadji-  
25 Lazaro J., Herbin H., Jacquinet-Husson N., Payan S., Péquignot E., Pierangelo C., Sellitto, P.,  
26 and Stubenrauch C.: Towards IASI-New Generation (IASI-NG): impact of improved spectral  
27 resolution and radiometric noise on the retrieval of thermodynamic, chemistry and climate  
28 variables, *Atmos. Meas. Tech.*, 7, 4367-4385, 2014.

29 Cuesta J., Eremenko M., Liu X., Dufour G., Cai Z., Höpfner M., von Clarmann T., Sellitto P.,  
30 Foret G., Gaubert B., Beekmann M., Orphal J., Chance K., Spurr R., and Flaud J.-M.:  
31 Satellite observation of lowermost tropospheric ozone by multi- spectral synergism of IASI

1 thermal infrared and GOME-2 ultraviolet measurements, *Atmos. Chem. Phys.*, 13, 9675-9693  
2 2013.

3 Davies D., Kumar S., and Descloitres J.: Global fire monitoring using MODIS near-real-time  
4 satellite data, *GIM International*, 18(4): 41-43, 2004.

5 Deeter M.N., Worden H.M., Gille J.C., Edwards D.P., Mao D., and Drummond J.R.,  
6 MOPITT multispectral CO retrievals: Origins and effects of geophysical radiance errors, *J.*  
7 *Geophys. Res.*, 116, D15303, 2011.

8 Deeter M.N., Martínez-Alonso S., Edwards D.P., Emmons L.K., Gille J.C., Worden H.M.,  
9 Pittman J.V., Daube B.C., and Wofsy S.C.: Validation of MOPITT Version 5 thermal-  
10 infrared, near-infrared, and multispectral carbon monoxide profile retrievals for 2000–2011, *J.*  
11 *Geophys. Res.*, 118(12), 6710-6725, 2013.

12 Deeter M.N., Martínez-Alonso S., Edwards D.P., Emmons L.K., Gille J.C., Worden H.M.,  
13 Sweeney C., Pittman J.V., Daube B.C., and Wofsy S.C.: The MOPITT Version 6 product:  
14 algorithm enhancements and validation, *Atmos. Meas. Tech.*, 7(11), 3623-3632, 2014.

15 de Laat A.T.J., Gloudermans A.M.S., Aben I., M. Krol, Meirink J.F., van der Werf G.R., and  
16 Schrijver H.: Scanning Imaging Absorption Spectrometer for Atmospheric Chartography  
17 carbon monoxide total columns: Statistical evaluation and comparison with chemistry  
18 transport model results, *J. Geophys. Res.*, 112, D12310, 2007.

19 Drummond J.R.: Measurements of Pollution in the Troposphere (MOPITT), in *The Use of*  
20 *EOS for Studies of Atmospheric Physics*, edited by J. C. Gille and G. Visconti, 77-101,  
21 North-Holland, Amsterdam, 1992.

22 Edwards D.P., Emmons L.K., Gille J.C., Chu A., Attié J.-L., Giglio L., Wood S.W., Haywood  
23 J., Deeter M.N., Massie S.T., Ziskin D.C. and Drummond J.R.: Satellite-observed pollution  
24 from Southern Hemisphere biomass burning, *J. Geophys. Res.*, 111, D14312, 1-17, 2006.

25 Eldering A., Kulawik S.S., Worden J., Bowman K., and Osterman G.: Implementation of  
26 cloud retrievals for TES atmospheric retrievals: 2. Characterization of cloud top pressure and  
27 effective optical depth retrievals, *J. Geophys. Res.*, 113, D16S37, 2008.

28 Emmons L.K., Pfister G.G., Edwards D.P., Gille J.C., Sachse G., Blake D., Wofsy S., Gerbig  
29 C., Matross D., and Nédélec P.: Measurements of pollution in the troposphere (MOPITT)

1 validation exercises during summer 2004 field campaigns over North America, *J. Geophys.*  
2 *Res.*, 112, D12S02, 2007.

3 Emmons L.K., Edwards D.P., Deeter M.N., Gille J.C., Campos T., Nédélec P., Novelli P., and  
4 Sachse G.: Measurements of Pollution in the Troposphere (MOPITT) validation through  
5 2006, *Atmos. Chem. Phys.*, 9, 1795-1803, 2009.

6 Fishman J., Iraci L.T., Al-Saadi J., Chance K., Chavez F., Chin M., Coble P., Davis C.,  
7 DiGiacomo P.M., Edwards D., Eldering A., Goes J., Herman J., Hu C., Jacob D. J., Jordan C.,  
8 Kawa S.R., Key R., Liu X., Lohrenz S., Mannino A., Natraj V., Neil D., Neu J., Newchurch  
9 M., Pickering K., Salisbury J., Sosik H., Subramaniam A., Tzortziou M., Wang J., and Wang  
10 M.: The United States' Next Generation of Atmospheric Composition and Coastal Ecosystem  
11 Measurements: NASA's Geostationary Coastal and Air Pollution Events (GEO-CAPE)  
12 Mission. *Bull. Amer. Meteor. Soc.*, 93, 1547-1566, 2012.

13 Fortems-Cheiney A., Chevallier F., Pison I., Bousquet P., Szopa S., Deeter M.N., and  
14 Clerbaux C.: Ten years of CO emissions as seen from Measurements of Pollution in the  
15 Troposphere (MOPITT), *J. Geophys. Res.*, 116, D05304, 1-17, 2011.

16 Fromm M., Bevilacqua R., Servranckx R., Rosen J., Thayer J.P., Herman J., and Larko D.:  
17 Pyro-cumulonimbus injection of smoke to the stratosphere: Observations and impact of a  
18 super blowup in northwestern Canada on 3–4 August 1998, *J. Geophys. Res.*, 110, D08205,  
19 2005.

20 Fromm M., Tupper A., Rosenfeld D., Servranckx R., and McRae R.: Violent pyro-convective  
21 storm devastates Australia's capital and pollutes the stratosphere, *Geophys. Res. Lett.*, 33,  
22 L05815, 2006.

23 [Fu D., Boone C.D., Bernath P.F., Walker K.A., Nassar R., Manney G.L. and McLeod S.D.:](#)  
24 [Global phosgene observations from the Atmospheric Chemistry Experiment \(ACE\) mission,](#)  
25 [Geophys. Res. Lett. 34\(17\), L17815, 2007.](#)

26 [Fu D., Boone C.D., Bernath P.F., Weisenstein D.K., Rinsland C.P., Manney G.L. and Walker](#)  
27 [K.A.: First global observations of atmospheric COCIF from the Atmospheric Chemistry](#)  
28 [Experiment mission, \*J. Quant. Spectrosc. Rad. Trans.\* 110 \(12\), 974–985, 2009.](#)

29 Fu D., Worden J.R., Liu X., Kulawik S.S., Bowman K.W., and Natraj V.: Characterization of  
30 ozone profiles derived from Aura TES and OMI radiances, *Atmos. Chem. Phys.*, 13, 3445-  
31 3462, 2013.

1 Gambacorta A., Barnet C., Wolf W., King T., Maddy E., Strow L., Xiong X., Nalli N., and  
2 Goldberg M.: An Experiment Using high spectral resolution CrIS measurements for  
3 atmospheric trace gases: carbon monoxide retrieval impact study, IEEE Geoscience and  
4 Remote Sensing Letters, 11, 9, 1639-1643, 2014.

5 George M., Clerbaux C., Hurtmans D., Turquety S., Coheur P.-F., Pommier M., Hadji-Lazaro  
6 J., Edwards D.P., Worden H., Luo M., Rinsland C., and McMillan W.: Carbon monoxide  
7 distributions from the [IASI/METOP](#) mission: Evaluation with other space-borne remote  
8 sensors, Atmos. Chem. Phys., 9, 8317-8330, 2009.

9 Giglio L., Descloitres J., Justice C.O., and Kaufman Y.J.: An enhanced contextual fire  
10 detection algorithm for MODIS, Remote Sensing of Environment, 87, 273-282, 2003.

11 Han Y., Revercomb H., Crompt M., Gu D., Johnson D., Mooney D., Scott D., Strow L.,  
12 Bingham G., Borg L., Chen C., DeSloover D., Esplin M., Hagan D., Jin X., Knuteson R.,  
13 Motteler H., Predina J., Suwinski L., Taylor J., Tobin D., Tremblay D., Wang C., Wang L.,  
14 Wang L., Zavyalov V.: Suomi NPP CrIS measurements, sensor data record algorithm,  
15 calibration and validation activities, and record data quality, J. Geophys. Res. Atmos., 118,  
16 12734-12748, 2013.

17 Han Y., Chen Y., Xiong X., and Jin X.: S-NPP CrIS full spectral resolution SDR processing  
18 and data quality assessment, 95<sup>th</sup> AMS Annual Meeting, Phoenix, Arizona, January 2015.

19 Heald C.L., Jacob D.J., Fiore A.M., Emmons L.K., Gille J.C., Deeter M.N., Warner J.,  
20 Edwards D.P., Crawford J.H., Hamlin A.J., Sachse G.W., Browell E.V., Avery M.A., Vay  
21 S.A., Westberg D.J., Blake D.R., Singh H.B., Sandholm S.T., Talbot R.W., and Fuelberg  
22 H.E.: Asian outflow and trans-Pacific transport of carbon monoxide and ozone pollution: An  
23 integrated satellite, aircraft, and model perspective, J. Geophys. Res., 108(D24), 4804-4820,  
24 2003.

25 Hook S., Friedl M., Sulla-Menashe D., Gray J., Schaaf C., Wang Z., Miura T., Huete A.,  
26 Maslanik J., Tschudi M., Baldwin D., Key J.R., Wang X., Liu Y., Riggs G., Hall D., Ellicott  
27 E., Giglio L., Schroeder W., Csaszar I., Lyapustin A., Vermote E., Wang Y., Myneni R.,  
28 Wolfe R., Foster J., Masuoka E.J., Devadiga S., Davidson C.: An Evaluation of the Suomi-  
29 NPP Visible Infrared Imaging Radiometer Suite (VIIRS) and the Associated Environmental  
30 Data Records for Land Science after Early Evaluation on On-Orbit Performance, NASA  
31 Goddard Space Flight Center Technical Report, 2012.

1 Ingmann P., Veihelmann B., Langen J., Lamarre D., Stark H., Bazalgette G. Lacoste C.:  
2 Requirements for the GMES Atmosphere Service and ESA's implementation concept:  
3 Sentinels-4/-5 and -5p, Remote Sensing of Environment, 120, 58-69, 2012.

4 Kalnay E., Kanamitsu M., Kistler R., Collins W., Deaven D., Gandin L., Iredell M., Saha S.,  
5 White G., Woollen J., Zhu Y., Chelliah M., Ebisuzaki W., Higgins W., Janowiak J., Mo K.C.,  
6 Ropelewski C., Wang J., Leetmaa A., Reynolds R., Jenne R., and Joseph D.: The  
7 NCEP/NCAR 40-year reanalysis project, B. Am. Meteorol. Soc., 77(3), 437-471, 1996.

8 Kar J., Deeter M.N., Fishman J., Liu Z., Omar A., Creilson J. K., Trepte C.R., Vaughan M.A.,  
9 and Winker D.M.: Wintertime pollution over the eastern Indo-Gangetic Plains as observed  
10 from MOPITT, CALIPSO and tropospheric ozone residual data, Atmos. Chem. Phys., 10,  
11 12273-12283, 2010.

12 Kopacz M., Jacob D.J., Henze D.K., Heald C.L., Streets D.G., and Zhang Q.: Comparison of  
13 adjoint and analytical Bayesian inversion methods for constraining Asian sources of carbon  
14 monoxide using satellite (MOPITT) measurements of CO columns, J. Geophys. Res., 114,  
15 D04305, 1-10, 2009.

16 Kulawik S.S., Worden J., Eldering A., Bowman K., Gunson M., Osterman G.B., Zhang L.,  
17 Clough S., Shephard M.W., and Beer R.: Implementation of cloud retrievals for Tropospheric  
18 Emission Spectrometer (TES) atmospheric retrievals: part 1. Description and characterization  
19 of errors on trace gas retrievals, J. Geophys. Res., 111, D24204, 2006.

20 Landgraf J. and Hasekamp O.P.: Retrieval of tropospheric ozone: The synergistic use of  
21 thermal infrared emission and ultraviolet reflectivity measurements from space, J. Geophys.  
22 Res., 112, D08310, 2007.

23 [Luo M., Read W., Kulawik S., Worden J., Livesey N., Bowman K., and Herman R.: Carbon](#)  
24 [monoxide \(CO\) vertical profiles derived from joined TES and MLS measurements, J.](#)  
25 [Geophys. Res., 118, 1-13, 2013.](#)

26 McMillan W.W., Barnet C., Strow L., Chahine M.T., McCourt M.L., Warner J.X., Novelli  
27 P.C., Korontzi S., Maddy E.S., and Datta S.: Daily global maps of carbon monoxide from  
28 NASA's Atmospheric Infrared Sounder, Geophys. Res. Lett., 32, L11801, 1 – 4, 2005.

29 Nassar R., Sioris C.E., Jones D.B.A., and McConnell J.C.: Satellite observations of CO<sub>2</sub> from  
30 a highly elliptical orbit for studies of the Arctic and boreal carbon cycle, J. Geophys. Res.  
31 Atmos., 119, 2654-2673, 2014.

1 Pagano T.S., Aumann H.H., Hagan D.E., and Overoye K.: Prelaunch and in-flight radiometric  
2 calibration of the Atmospheric Infrared Sounder (AIRS), *Geoscience and Remote Sensing*,  
3 *IEEE Transactions on*, 41(2), 265-273, 2003.

4 Park M., Randel W.J., Kinnison D.E., Garcia R.R., and Choi W.: Seasonal variation of  
5 methane, water vapor, and nitrogen oxides near the tropopause: Satellite observations and  
6 model simulations, *J. Geophys. Res., Atmos.*, 109, D03302, 2004.

7 Platnick S., Ackerman S.A., Baum B.A., Heidinger A.K., Holz R.E., King M.D., Menzel  
8 W.P., Nasiri S., Weisz E., Yang P.: Assessment of IDPS VIIRS Cloud Products and  
9 Recommendations for EOS-ERA Cloud Climate Data Record Continuity, NASA Goddard  
10 Space Flight Center Technical Report, 2013.

11 Rienecker M., Suarez M.J., Todling R., Bacmeister J., Takacs L., Liu H.-C., Gu W.,  
12 Sienkiewicz M., Koster R. D., Gelaro R., Stajner I., and Nielsen J. E.: The GEOS-5 data  
13 assimilation system-documentation of versions 5.0.1, 5.1.0, and 5.2.0., technical report series  
14 on global modeling and data assimilation, 104606, 27, 2008.

15 Rienecker M.M., Suarez M.J., Gelaro R., Todling R., Bacmeister J., Liu E., Bosilovich M.G.,  
16 Schubert S.D., Takacs L., Kim G.-K., Bloom S., Chen J., Collins D., Conaty A., da Silva A.,  
17 Gu W., Joiner J., Koster R.D., Lucchesi R., Molod A., Owens T., Pawson S., Pegion P.,  
18 Redder C.R., Reichle R., Robertson F.R., Ruddick A.G., Sienkiewicz M., and Woollen J.:  
19 MERRA: NASA's Modern-Era Retrospective Analysis for Research and Applications. *J.*  
20 *Climate*, 24, 3624-3648, 2011.

21 Rinsland C.P., Luo M., Logan J.A., Beer R., Worden H., Kulawik S.S., Rider D., Osterman  
22 G., Gunson M., Eldering A., Goldman A., Shephard M., Clough S.A., Rodgers C., Lampel M.  
23 and Chiou L.: Nadir measurements of carbon monoxide distributions by the Tropospheric  
24 Emission Spectrometer instrument onboard the Aura Spacecraft: Overview of analysis  
25 approach and examples of initial results, *Geophys. Res. Lett.*, 33, L22806, 2006.

26 Rodgers C.D.: *Inverse methods for atmospheric sounding: Theory and practice*, Word  
27 Scientific Publishing, Singapore, 2000.

28 Seemann S.W., Borbas E.E., Knuteson R.O., Stephenson G.R., and Huang H.-L.:  
29 Development of a global infrared land surface emissivity database for application to clear sky  
30 sounding retrievals from multispectral satellite radiance measurements. *J. Appl. Meteor.*  
31 *Climatol.*, 47, 108-123, 2008.

1 Shindell D.T., Faluvegi G., Stevenson D.S., Krol M.C., Emmons L.K., Lamarque J.-F., Pétron  
2 G., Dentener F.J., Ellingsen K., Schultz M.G., Wild O., Amann M., Atherton C.S., Bergmann  
3 D.J., Bey I., Butler T., Cofala J., Collins W.J., Derwent R.G., Doherty R.M., Drevet J., Eskes  
4 H.J., Fiore A.M., Gauss M., Hauglustaine D.A., Horowitz L.W., Isaksen I.S.A., Lawrence  
5 M.G., Montanaro V., Müller J.-F., Pitari G., Prather M.J., Pyle J.A., Rast S., Rodriguez J.M.,  
6 Sanderson M.G., Savage N.H., Strahan S.E., Sudo K., S. Szopa, Unger N., van Noije T.P.C.  
7 and Zeng G.: Multimodel simulations of carbon monoxide: Comparison with observations  
8 and projected near-future changes, *J. Geophys. Res.*, 111, D19306, 1-24, 2006.

9 Silva S.J., Arellano A.F., and Worden H.M.: Toward anthropogenic combustion emission  
10 constraints from space-based analysis of urban CO<sub>2</sub>/CO sensitivity, *Geophys. Res. Lett.*,  
11 40(18), 4971-4976, 2013.

12 Spurr R.J.D.: VLIDORT: A linearized pseudo-spherical vector discrete ordinate radiative  
13 transfer code for forward model and retrieval studies in multilayer multiple scattering media,  
14 *J. Quant. Spectrosc. and Radiat. Transfer*, 102(2): 316-342, 2006.

15 Spurr R.J.D., de Haan J., van Oss R., and Vasilkov A.: Discrete Ordinate Theory in a  
16 Stratified Medium with First Order Rotational Raman Scattering; a General Quasi-Analytic  
17 Solution, *J. Quant. Spectrosc. Radiat. Transfer*, 109, 404-425, 2008.

18 Strow L., Blackwell W., Fishbein E., Lambrigtsen B., and Revercomb H.: NPP Sounding  
19 Group Evaluation Report, NASA Goddard Space Flight Center Technical Report, 2013a.

20 Strow, L. L., Motteler H., Tobin D., Revercomb H., Hannon S., Buijs H., Predina J., Suwinski  
21 L., and Glumb R.: Spectral calibration and validation of the Cross-track Infrared Sounder on  
22 the Suomi NPP satellite, *J. Geophys. Res. Atmos.*, 118, 12486-12496, 2013b.

23 Tobin D., Revercomb H., Knuteson R., Taylor J., Best F., Borg L., DeSlover D., Martin G.,  
24 Buijs H., Esplin M., Glumb R., Han Y., Mooney D., Predina J., Strow L., Suwinski L., Wang  
25 L.: Suomi-NPP CrIS radiometric calibration uncertainty, *J. Geophys. Res. Atmos.*, 118,  
26 10589-10600, 2013.

27 Veefkind J.P., Aben I., McMullan K., Försterd H., de Vries J., Otter G., Claas J., Eskes H.J.,  
28 de Haan J.F., Kleipool Q., van Weele M., Hasekamp O., Hoogeveen R., Landgraf J., Snel R.,  
29 Tol P., Ingmann P., Voors R., Kruizinga B., Vink R., Visser H., Levelt P.F.: TROPOMI on  
30 the ESA Sentinel-5 Precursor: A GMES mission for global observations of the atmospheric

1 composition for climate, air quality and ozone layer applications, *Remote Sensing of*  
2 *Environment*, 120, 70-83, 2012.

3 Wang L., Tremblay D.A., Han Y., Esplin M., Hagan D.E., Predina J., Suwinski L., Jin X., and  
4 Chen Y.: Geolocation assessment for CrIS sensor data records, *J. Geophys. Res. Atmos.*, 118,  
5 12690-12704, 2013.

6 Warner J., Comer M.M., Barnet C.D., McMillan W.W., Wolf W., Maddy E., and Sachse G.:  
7 A comparison of satellite tropospheric carbon monoxide measurements from AIRS and  
8 MOPITT during INTEx-A, *J. Geophys. Res.*, 112, D12S17, 1-18, 2007.

9 Worden H.M., Deeter M.N., Edwards D.P., Gille J.C., Drummond J.R., and Nédélec P.P.:  
10 Observations of near-surface carbon monoxide from space using MOPITT multispectral  
11 retrievals, *J. Geophys. Res.*, 115, D18314, 2010.

12 Worden H.M., Deeter M.N., Frankenberg C., George M., Nichitiu F., Worden J., Aben I.,  
13 Bowman K.W., Clerbaux C., Coheur P.F., de Laat A.T.J., Detweiler R., Drummond J.R.,  
14 Edwards D.P., Gille J.C., Hurtmans D., Luo M., Martínez-Alonso S., Massie S., Pfister G.,  
15 and Warner J.X.: Decadal record of satellite carbon monoxide observations, *Atmos. Chem.*  
16 *and Phys.*, 13, 837-850, 2013a.

17 Worden H.M., Edwards D.P., Deeter M.N., Fu D., Kulawik S.S., Worden J.R., and Arellano  
18 A.: Averaging kernel prediction from atmospheric and surface state parameters based on  
19 multiple regression with MOPITT CO and TES-OMI O<sub>3</sub> multispectral observations, *Atmos.*  
20 *Meas. Tech.*, 6, 1633-646, 2013b.

21 Zhang L., Jacob D.J., Bowman K.W., Logan J.A., Turquety S., Hudman R.C., Li Q., Beer R.,  
22 Worden H.M., Worden J.R., Rinsland C.P., Kulawik S.S., Lampel M.C., Shephard M.W.,  
23 Fisher B.M., Eldering A., and Avery M.A.: Ozone-CO correlations determined by the TES  
24 satellite instrument in continental outflow regions, *Geophys. Res. Lett.*, 33, 2006.

25

26

27

28

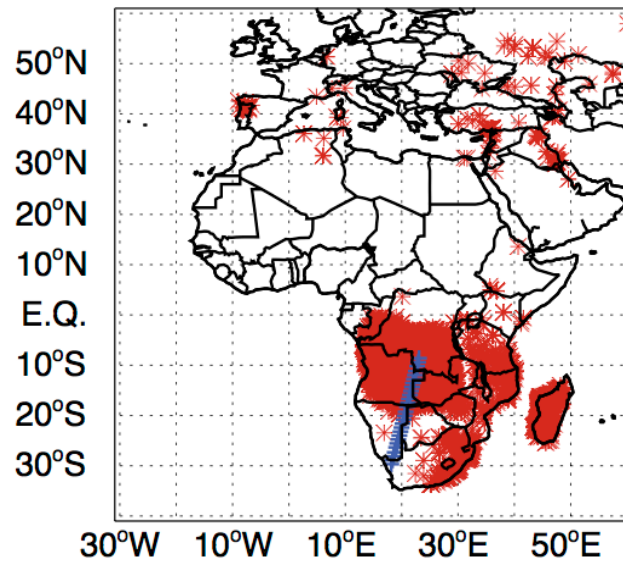

1

2 **Figure 1.** Collocated Suomi-NPP CrIS measurements (blue cross) over Africa on August 28<sup>th</sup>,  
 3 2013 and Terra MOPITT observations on August 27<sup>th</sup>, 2013. The red stars represent the fire  
 4 location measured by Aqua MODIS on August 28<sup>th</sup>, 2013.  
 5

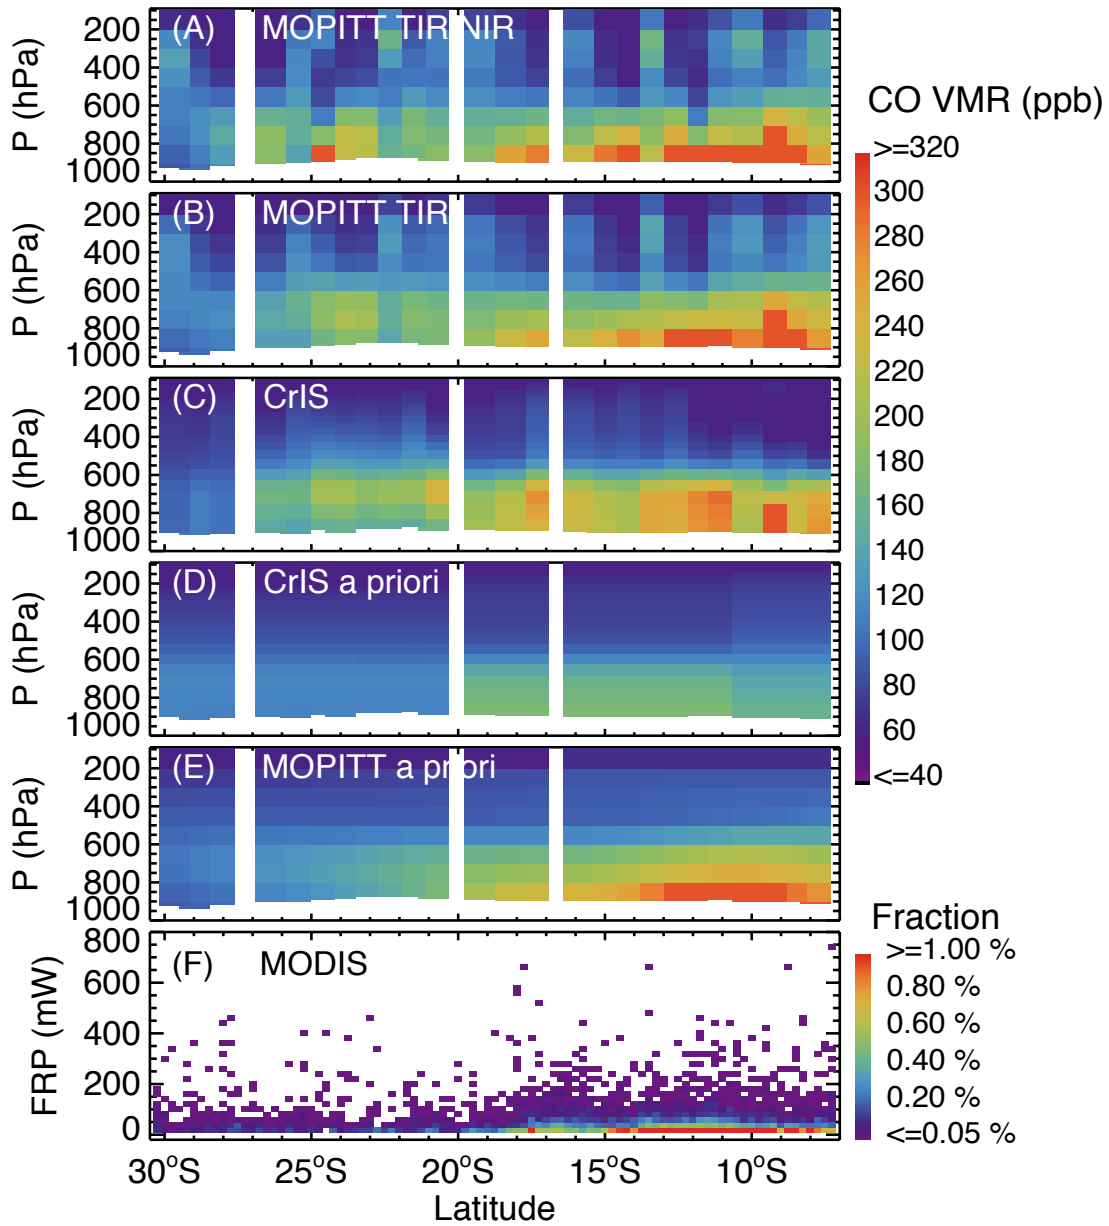

**Figure 2.** Tropospheric carbon monoxide (CO) volume mixing ratio (parts-per-billion) profiles measured by Terra MOPITT (version 6.0) on August 27<sup>th</sup>, Suomi-NPP CrIS on August 28<sup>th</sup> 2013, and fire radiative power (milliwatts) measured by Aqua MODIS. (Panel A) MOPITT joint TIR/NIR CO fields; (Panel B) MOPITT TIR CO fields; (Panel C) CrIS TIR CO fields using a priori profiles used in the Aura TES operational retrievals; (Panel D) a priori CO fields used in CrIS retrievals shown in Panel C. (Panel E) a priori profiles used in the MOPITT operational retrievals shown in Panels A and B; (Panel F) Fire radiative power measured by Aqua MODIS over Africa for August 28<sup>th</sup>, 2013.

1

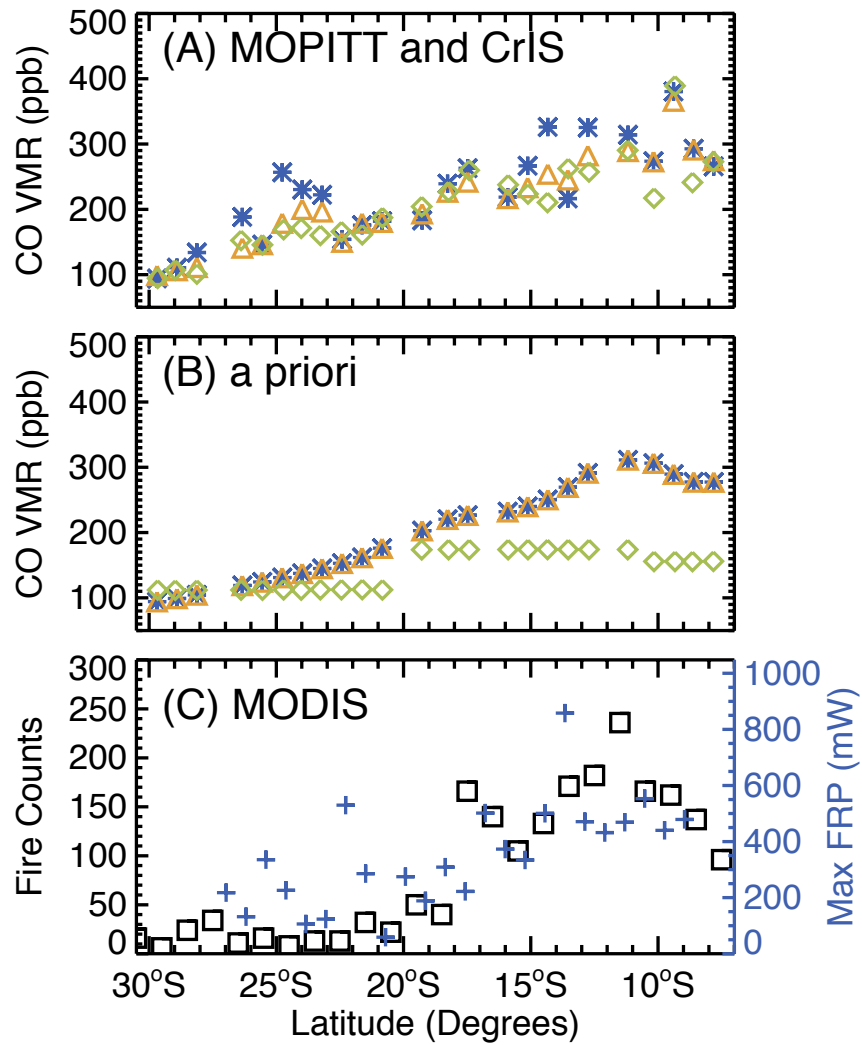

2

3 **Figure 3.** Averaged carbon monoxide (CO) volume mixing ratio (parts-per-billion) from  
 4 surface to 3km (~700 hPa), fire counts and maximum fire radiative power (milliwatts)  
 5 measured by Aqua MODIS over Africa for August 28<sup>th</sup>, 2013. (Panel A) MOPITT joint  
 6 TIR/NIR CO data products (blue stars), MOPITT TIR CO data products (green triangles), and  
 7 CrIS TIR CO VMR using a priori profiles identical to those used in the Aura TES operational  
 8 retrievals (golden diamonds); (Panel B) a priori CO VMR used in MOPITT (green/blue) and  
 9 CrIS (gold) retrievals. (Panel C) Fire counts (black squares) and maximum fire radiative  
 10 power (blue plus) among the Aqua MODIS measurements whose data quality confidences are  
 11 greater than 70%.

12

13

14

15

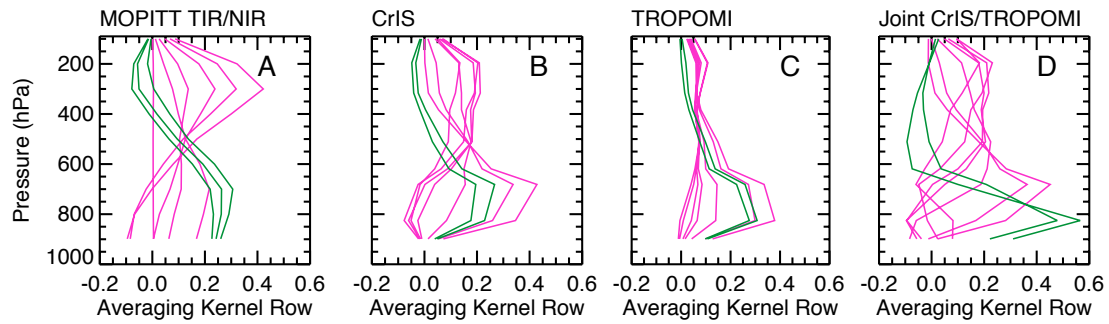

**Figure 4.** Sample averaging kernels of measurements for the target scene near 22.99°E, 8.65°S. In all panels, green lines are the averaging kernels from the surface to 3 km (~700 hPa); magenta lines are the averaging kernels from 3 km (~700 hPa) to 100 hPa. (Panel A) MOPITT joint NIR/TIR measurements; (Panel B) Suomi-NPP CrIS TIR measurements; (Panel C) synthetic S5p TROPOMI NIR measurements; (Panel D) synthetic joint CrIS/TROPOMI (TIR/NIR) measurements.

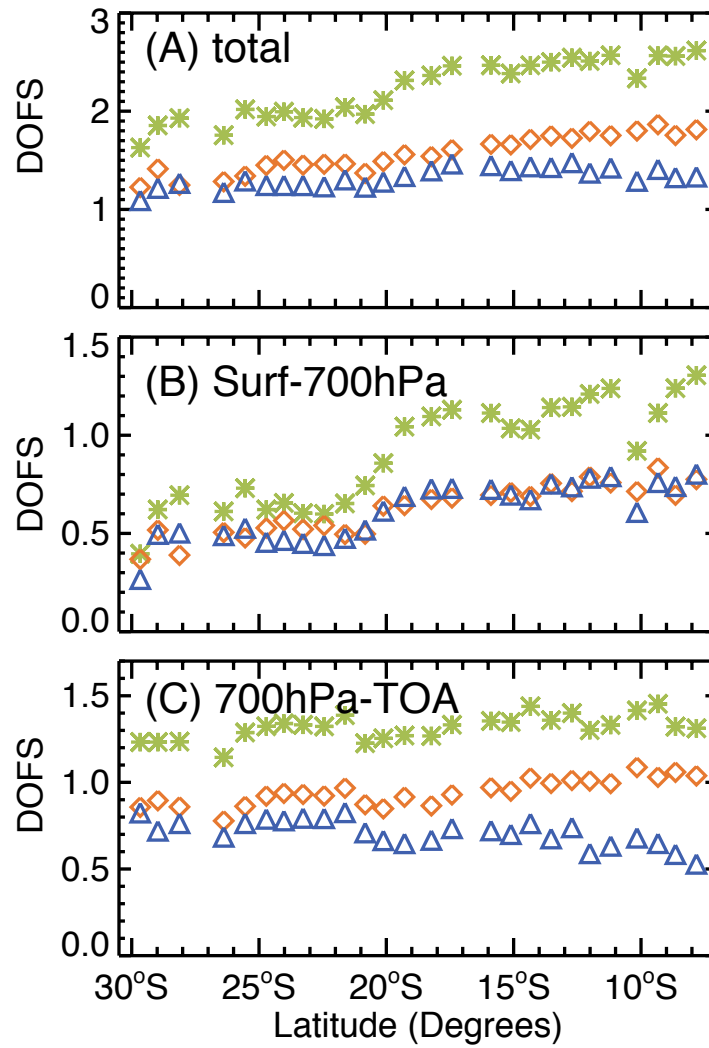

**Figure 5.** Degrees of freedom for CO measurements from CrIS, along with the synthetic TROPOMI alone and joint CrIS and TROPOMI measurements over the biomass-burning region. Green stars are the DOFS for joint TROPOMI and CrIS; gold diamonds are for the DOFS for CrIS; and blue triangles are for DOFS from TROPOMI measurements.

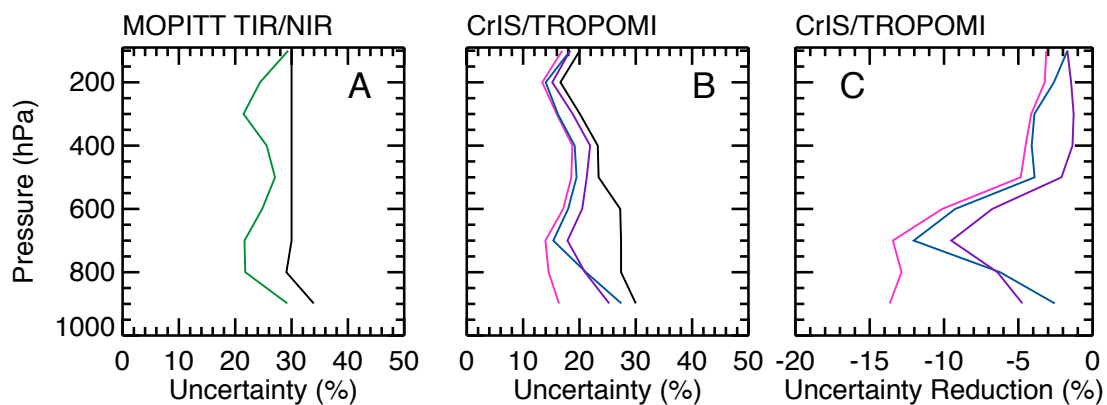

**Figure 6.** Uncertainties of the carbon monoxide (CO) volume mixing ratio (VMR) profiles near 22.99°E, 8.65°S on August 28th, 2013. (Panel A) Uncertainty of the joint MOPITT multiple spectral CO products (green line), and a priori profile (black line); (Panel B) Uncertainty of CrIS actual CO measurements (blue line), synthetic TROPOMI (purple line) and joint CrIS/TROPOMI (magenta line) CO measurements. Black line is the uncertainty of a priori profile used in the retrievals; (Panel C) The reduction on the uncertainty with respect to the uncertainty of a priori profile.

**Table 1.** Satellite missions that measure tropospheric carbon monoxide.

| Mission                   | Nominal<br>Life Time | Years after Its<br>Design Life Time | Spectral Resolution<br>cm <sup>-1</sup> |                        | Footprint<br>Size      | Swath<br>Width |
|---------------------------|----------------------|-------------------------------------|-----------------------------------------|------------------------|------------------------|----------------|
|                           | Start – End          | Year                                | TIR <sup>A</sup>                        | NIR <sup>B</sup>       | km <sup>2</sup>        | km             |
| CHS/TROPOMI               | 2016 – 2023          | 0                                   | 0.625 <sup>C</sup>                      | 0.458                  | 14 × 14 <sup>D</sup>   | 2200           |
| MOPITT                    | 2000 – 2006          | 9                                   | ~0.04 eff <sup>E</sup>                  | ~0.25 eff <sup>E</sup> | 22 × 22                | 640            |
| CrIS                      | 2011 – 2026          | 0                                   | 0.625 <sup>C</sup>                      | NA                     | π × 441 <sup>D,F</sup> | 2200           |
| TES                       | 2004 – 2010          | 5                                   | 0.06 <sup>C</sup>                       | NA                     | 8 × 5                  | 5              |
| AIRS                      | 2002 – 2008          | 7                                   | ~ 1.800                                 | NA                     | π × 441 <sup>D,F</sup> | 1600           |
| TROPOMI                   | 2016 – 2023          | 0                                   | NA                                      | ~ 0.458                | 7 × 7                  | 2600           |
| SCIAMACHY                 | 2002 – 2007          | Terminated <sup>G</sup>             | NA                                      | ~ 0.485                | 30 × 120               | 960            |
| IASI-A, B, C <sup>H</sup> | 2006 - 2023          | 0                                   | 0.25 <sup>C</sup>                       | NA                     | π × 576 <sup>F</sup>   | 2200           |
| ACE-FTS <sup>I</sup>      | 2003 – 2005          | 10                                  | 0.02                                    | 0.02                   | NA                     | NA             |

<sup>A</sup> First fundamental band of carbon monoxide, centered around 4.6 μm in the thermal infrared.

<sup>B</sup> First overtone band of carbon monoxide, centered around 2.3 μm in the near infrared.

<sup>C</sup> Specified values are the spectral resolution without apodization.

<sup>D</sup> The spatial resolution of data products from this work are 9 times higher than the existing operational CrIS and AIRS data products, since we use single footprint CrIS L1B radiances in the retrievals, instead of cloud cleared radiances.

<sup>E</sup> MOPITT uses gas filter correlation radiometry (GFCR) with estimated effective spectral resolution.

<sup>F</sup> Estimated footprint sizes of [AIRS](#), [CrIS](#) and [IASI](#) measurements since both sensors have circular fields of view.

<sup>G</sup> The measurements from SCIAMACHY ceased in 2012.

<sup>H</sup> The IASI-A and IASI-B instruments are on-board MetOp-A (launched in 2006) and MetOp-B (launched in 2012) satellites. The third IASI instrument will be on-board MetOp-C with an estimated launch date in 2018. MetOp-A and B satellites are in a sun-synchronous, 827 km altitude orbit with a 9:30 am equator crossing time (ascending node), a few hours earlier than that of S5-P satellite. The IASI CO data product was retrieved from the 4.6 μm band (George et al., 2009).

<sup>I</sup> ACE-FTS on board the Canadian satellite SCISAT, operating in the solar occultation measurement mode at sunrise and sunset, provide high vertical resolution (3-4 km) profiles in the altitude region from middle troposphere to the thermosphere for over 30 atmospheric trace gases as well as the meteorological variables of temperature and pressure (Bernath et al., 2005; Boone et al., 2005; Fu et al., 2007; Allen et al., 2009; Fu et al., 2009). The operational ACE-FTS CO data product was jointly retrieved from the 2.3 and 4.6 μm bands (Clerbaux et al., 2008b).

**Table 2.** List of parameters in state vector.

| Case Selection <sup>A</sup> | Fitting Parameters                                                               | Number of Parameters | A Priori                                     | A Priori Variance           |
|-----------------------------|----------------------------------------------------------------------------------|----------------------|----------------------------------------------|-----------------------------|
| CrIS/TROPOMI, CrIS, TROPOMI | CO at each pressure level                                                        | 14                   | MOZART-3 <sup>B</sup>                        | MOZART-3                    |
| CrIS/TROPOMI, CrIS, TROPOMI | H <sub>2</sub> O at each pressure level                                          | 16                   | GEOS-5 <sup>C</sup>                          | NCEP ~30% <sup>D</sup>      |
| CrIS/TROPOMI, CrIS          | N <sub>2</sub> O at each pressure level                                          | 25                   | MOZART-3                                     | MOZART-3                    |
| CrIS/TROPOMI, CrIS, TROPOMI | CH <sub>4</sub> at each pressure level                                           | 25                   | MOZART-3                                     | MOZART-3                    |
| CrIS/TROPOMI, CrIS          | Surface temperature                                                              | 1                    | GEOS-5                                       | 0.5K                        |
| CrIS/TROPOMI, CrIS          | Surface emissivity <sup>E</sup>                                                  | 5                    | UOW-M data base <sup>F</sup>                 | ~0.006                      |
| CrIS/TROPOMI, CrIS          | Cloud extinction <sup>G</sup>                                                    | 3                    | Initial BT difference                        | 300%                        |
| CrIS/TROPOMI, CrIS          | Cloud top pressure <sup>G</sup>                                                  | 1                    | 500 mbar                                     | 100%                        |
| CrIS/TROPOMI, TROPOMI       | Gaussian parameters of optical depth profile for ice cloud <sup>H</sup>          | 3                    | [0.0125,0.30,0.04] <sup>I</sup>              | [7.4,0.2,0.01] <sup>I</sup> |
| CrIS/TROPOMI, TROPOMI       | Gaussian parameters of optical depth profile for water cloud <sup>H</sup>        | 3                    | [0.0125,0.75,0.10] <sup>I</sup>              | [7.4,0.4,0.01] <sup>I</sup> |
| CrIS/TROPOMI, TROPOMI       | Gaussian parameters of optical depth profile for primary aerosols <sup>H</sup>   | 3                    | [MERRA <sup>J</sup> ,0.90,0.05] <sup>I</sup> | [7.4,0.4,0.01] <sup>I</sup> |
| CrIS/TROPOMI, TROPOMI       | Gaussian parameters of optical depth profile for secondary aerosols <sup>H</sup> | 3                    | [MERRA <sup>J</sup> ,0.90,0.05] <sup>I</sup> | [7.4,0.4,0.01] <sup>I</sup> |
| CrIS/TROPOMI, TROPOMI       | Surface albedo zero order term                                                   | 1                    | from Spectra <sup>K</sup>                    | 0.2                         |
| CrIS/TROPOMI, TROPOMI       | Surface albedo first order term                                                  | 1                    | 0                                            | 0.0005/cm <sup>-1</sup>     |
| CrIS/TROPOMI, TROPOMI       | Radiance/irradiance wavelength shifts                                            | 2                    | 0                                            | 0.5 cm <sup>-1</sup>        |

<sup>A</sup> The parameters are included in the retrievals for different cases (CrIS only, TROPOMI only, and joint CrIS/TROPOMI).

<sup>B</sup> Model for OZone and Related chemical Tracers (MOZART) 3 (Brasseur et al., 1998; Park et al., 2004).

<sup>C</sup> Goddard Earth Observing System, version 5 (GEOS-5) (Rienecker et al., 2008).

<sup>D</sup> National Center for Environmental Prediction (NCEP) reanalysis (Kalnay et al., 1996).

<sup>E</sup> Retrievals over land, spectral surface emissivity is included.

<sup>F</sup> Global infrared land surface emissivity database at University of Wisconsin-Madison (UOW-M) (Seemann et al., 2008).

<sup>G</sup> For cloud treatment in TIR spectral region, we adopt the approach used in the TES Level 2 full physics retrieval algorithm (Kulawik et al., 2006; Eldering et al., 2008).

<sup>H</sup> For cloud treatment in NIR spectral region, we adopt the approach used in the OCO-2 Level 2 full physics retrieval algorithm (Pages 28-31, 44-45, Boesch et al., 2015).

The wavelength-dependent optical property would be scaled to that of TROPOMI.

<sup>I</sup> Gaussian parameters represent the total optical depth, peak altitude, and profile width. The peak altitude and profile width are normalized to the pressure at surface.

<sup>J</sup> Modern Era Retrospective analysis for Research and Applications aerosol reanalysis (MERRAero) climatology (2009-2010) (Rienecker et al., 2011; Buchard et al., 2015)

<sup>K</sup> The surface is assumed to be Lambertian with a variable slope in wavelength to the albedo, such that the albedo can vary linearly across the spectral band. A priori value of surface albedo for zero order term are estimated from the measured continuum radiances, using the following equation:  $A = \frac{\pi I}{\mu_0 I_0}$ , where, I is the measured Earth shine radiance in the continuum, I<sub>0</sub> is the solar continuum spectral irradiance,  $\mu_0$  is the cosine of the solar zenith angle.

1 **Table 3.** The differences of carbon monoxide volume mixing ratio in the lower troposphere (surface to 3km (~700 hPa)) between CrIS and  
2 MOPITT measurements shown in Figure 3A.

| Data Product                | Mean  |      | RMS  |      |
|-----------------------------|-------|------|------|------|
|                             | ppb   | %    | ppb  | %    |
| CrIS - MOPITT TIR           | -6.9  | -2.9 | 22.8 | 9.7  |
| CrIS - MOPITT Joint TIR/NIR | -22.9 | -8.8 | 38.8 | 15.2 |

3  
4  
5  
6  
7  
8  
9  
10  
11  
12

1 **Table 4.** Degrees of freedom for MOPITT, CrIS, and TROPOMI carbon monoxide measurements.

| Altitude Range                       | Sensor  | TIR  | NIR  | Joint TIR/NIR     |
|--------------------------------------|---------|------|------|-------------------|
| Surface to Top of Atmosphere         | MOPITT  | 1.44 | 0.51 | 1.88              |
|                                      | CrIS    | 1.57 | -    | 2.22 <sup>A</sup> |
|                                      | TROPOMI | -    | 1.32 |                   |
| LMT: Surface to 3 km (~700 hPa)      | MOPITT  | 0.56 | 0.30 | 0.77              |
|                                      | CrIS    | 0.62 | -    | 0.91 <sup>A</sup> |
|                                      | TROPOMI | -    | 0.61 |                   |
| 3 km (~700 hPa) to Top of Atmosphere | MOPITT  | 0.89 | 0.21 | 1.11              |
|                                      | CrIS    | 0.94 | -    | 1.32 <sup>A</sup> |
|                                      | TROPOMI | -    | 0.71 |                   |

2 <sup>A</sup> It is the synergistic CrIS/TROPOMI product.

3 **Table 5.** Estimated percentage uncertainty for MOPITT, CrIS, and TROPOMI carbon monoxide measurements.

| Altitude Range                       | Sensor  | TIR  | NIR  | Joint TIR/NIR    |
|--------------------------------------|---------|------|------|------------------|
| Surface to Top of Atmosphere         | MOPITT  | 8.4  | 9.9  | 8.2              |
|                                      | CrIS    | 3.1  | -    | 2.9 <sup>A</sup> |
|                                      | TROPOMI | -    | 3.2  |                  |
| LMT: Surface to 3 km (~700 hPa)      | MOPITT  | 14.1 | 17.1 | 14.3             |
|                                      | CrIS    | 13.8 | -    | 9.2 <sup>A</sup> |
|                                      | TROPOMI | -    | 13.5 |                  |
| 3 km (~700 hPa) to Top of Atmosphere | MOPITT  | 9.5  | 11.3 | 9.7              |
|                                      | CrIS    | 3.1  | -    | 3.0 <sup>A</sup> |
|                                      | TROPOMI | -    | 3.2  |                  |

4 <sup>A</sup> It is the synergistic CrIS/TROPOMI product.

5
